# Supplementary material for: Diagnostic Accuracy of Dehydroepiandrosterone Sulfate and Corticotropin in Autonomous Cortisol Secretion
Source: MDPI journal article supplement (doi:10.3390/biomedicines9070741), 2021-06-28
Supplement: s1 [file s1]

| <b>Supplemental Table S1. Reference values for DHEA-S adjusted by age and sex*</b> |                               |                             |
|------------------------------------------------------------------------------------|-------------------------------|-----------------------------|
| <b>Age (Years)</b>                                                                 | <b>Female DHEA-S (mcg/dL)</b> | <b>Male DHEA-S (mcg/dL)</b> |
| <b>18-30</b>                                                                       | <b>83-377</b>                 | <b>105-728</b>              |
| <b>31-40</b>                                                                       | <b>45-295</b>                 | <b>57-522</b>               |
| <b>41-50</b>                                                                       | <b>27-240</b>                 | <b>34-395</b>               |
| <b>51-60</b>                                                                       | <b>16-195</b>                 | <b>20-299</b>               |
| <b>61-70</b>                                                                       | <b>9.7-159</b>                | <b>12-227</b>               |
| <b>≥71</b>                                                                         | <b>5.3-124</b>                | <b>6.6-162</b>              |

\* Mayo Clinic Laboratories. Dehydroepiandrosterone Sulfate, Serum

<https://www.mayocliniclabs.com/test-catalog/Clinical+and+Interpretive/113595>

| <b>Supplemental Table S2. Diagnostic accuracy parameters for serum DHEA-S and ACTH concentration cutoffs in diagnosing mild autonomous cortisol secretion (MACS)</b> |                                    |                                    |                            |                            |                                   |
|----------------------------------------------------------------------------------------------------------------------------------------------------------------------|------------------------------------|------------------------------------|----------------------------|----------------------------|-----------------------------------|
| <b>Cutoff</b>                                                                                                                                                        | <b>Sensitivity, %<br/>(95% CI)</b> | <b>Specificity, %<br/>(95% CI)</b> | <b>PPV, %<br/>(95% CI)</b> | <b>NPV, %<br/>(95% CI)</b> | <b>False Positive<br/>Rate, %</b> |
| <b>DHEA-S<br/>&lt;40 mcg/dL</b>                                                                                                                                      | 55.0<br>(47.2 - 62.7)              | 83.5<br>(77.8 - 88.2)              | 72.7<br>(65.6 - 78.7)      | 70.0<br>(66.1 - 73.6)      | 16.5                              |
| <b>ACTH<br/>&lt;10 pg/mL</b>                                                                                                                                         | 53.7<br>(44.9 - 62.4)              | 75.3<br>(67.7 - 81.9)              | 65.5<br>(58.0 - 72.2)      | 65.2<br>(60.4 - 69.6)      | 24.7                              |
| <b>DHEA-S &lt; 40 mcg/dL<br/>and ACTH &lt;10 pg/mL</b>                                                                                                               | 32.1<br>(24.3 - 40.7)              | 91.6<br>(86.0 - 95.4)              | 76.8<br>(65.0 - 85.5)      | 60.8<br>(57.7 - 63.7)      | 8.4                               |
| ACTH, corticotropin; DHEA-S, dehydroepiandrosterone sulfate; DST, dexamethasone suppression test<br>MACS was defined as post-DST cortisol of 1.9-5 mcg/dL            |                                    |                                    |                            |                            |                                   |

| <b>Supplemental Table S3. Diagnostic accuracy parameters for serum DHEA-S and ACTH concentration cutoffs in diagnosing nonfunctioning adrenal tumor (NFAT)</b> |                                    |                                    |                            |                            |                                   |
|----------------------------------------------------------------------------------------------------------------------------------------------------------------|------------------------------------|------------------------------------|----------------------------|----------------------------|-----------------------------------|
| <b>Cutoff</b>                                                                                                                                                  | <b>Sensitivity, %<br/>(95% CI)</b> | <b>Specificity, %<br/>(95% CI)</b> | <b>PPV, %<br/>(95% CI)</b> | <b>NPV, %<br/>(95% CI)</b> | <b>False Positive<br/>Rate, %</b> |
| <b>DHEA-S and DHEA-S ratio</b>                                                                                                                                 |                                    |                                    |                            |                            |                                   |
| <b>DHEA-S<br/>&gt;50 mcg/dL</b>                                                                                                                                | 76.4<br>(70.1 - 82.0)              | 65.6<br>(59.5 - 71.4)              | 64.8<br>(60.5 - 68.9)      | 77.1<br>(72.2 - 81.3)      | 34.4                              |
| <b>DHEA-S<br/>&gt;80 mcg/dL</b>                                                                                                                                | 53.8<br>(46.8 - 60.6)              | 83.2<br>(78.1 - 87.6)              | 72.6<br>(66.3 - 78.2)      | 68.5<br>(65.1 - 71.7)      | 16.8                              |
| <b>DHEA-S<br/>&gt;100 mcg/dL</b>                                                                                                                               | 42.9<br>(36.2 - 49.9)              | 88.7<br>(84.1 - 92.3)              | 75.8<br>(68.3 - 82.1)      | 65.2<br>(62.4 - 68.0)      | 11.3                              |
| <b>ACTH</b>                                                                                                                                                    |                                    |                                    |                            |                            |                                   |
| <b>ACTH<br/>&gt;20 pg/mL</b>                                                                                                                                   | 27.3<br>(20.4 - 35.0)              | 87.6<br>(82.4 - 91.6)              | 60.9<br>(50.1 - 70.7)      | 62.9<br>(60.3 - 65.4)      | 12.4                              |
| <b>ACTH<br/>&gt;25 pg/mL</b>                                                                                                                                   | 14.9<br>(9.7 - 21.6)               | 90.8<br>(86.1 - 94.3)              | 53.5<br>(39.6 - 66.9)      | 60.1<br>(58.2 - 61.9)      | 9.2                               |
| <b>ACTH<br/>&gt;30 pg/mL</b>                                                                                                                                   | 9.1<br>(5.1 - 14.8)                | 94.5<br>(90.5 - 97.1)              | 53.9<br>(35.7 - 71.0)      | 59.4<br>(58.0 - 60.8)      | 5.5                               |
| <b>DHEA-S and ACTH</b>                                                                                                                                         |                                    |                                    |                            |                            |                                   |
| <b>DHEA-S &gt; 50 mcg/dL<br/>and ACTH &gt;20 pg/mL</b>                                                                                                         | 24.0<br>(17.5 - 31.6)              | 92.2<br>(87.8 - 95.4)              | 68.5<br>(56.0 - 78.8)      | 63.1<br>(60.8 - 65.3)      | 7.8                               |
| <b>DHEA-S &gt; 50 mcg/dL<br/>and ACTH &gt;25 pg/mL</b>                                                                                                         | 13.0<br>(8.1 - 19.3)               | 94.0<br>(90.0 - 96.8)              | 60.6<br>(44.1 - 75.0)      | 60.4<br>(58.7 - 62.0)      | 6.0                               |
| <b>DHEA-S &gt; 50 mcg/dL<br/>and ACTH &gt;30 pg/mL</b>                                                                                                         | 7.8<br>(4.1 - 13.2)                | 96.8<br>(93.5 - 98.7)              | 63.2<br>(40.9 - 81.0)      | 59.7<br>(58.4 - 60.9)      | 3.2                               |
| <b>DHEA-S &gt; 80 mcg/dL<br/>and ACTH &gt;20 pg/mL</b>                                                                                                         | 17.5<br>(11.9 - 24.5)              | 95.4<br>(91.7 - 97.8)              | 72.8<br>(57.4 - 84.4)      | 62.0<br>(60.1 - 63.8)      | 4.6                               |
| <b>DHEA-S &gt; 80 mcg/dL<br/>and ACTH &gt;25 pg/mL</b>                                                                                                         | 10.4<br>(6.1 - 16.3)               | 96.3<br>(92.9 - 98.4)              | 66.7<br>(46.8 - 82.0)      | 60.2<br>(58.8 - 61.7)      | 3.7                               |
| <b>DHEA-S &gt; 80 mcg/dL<br/>and ACTH &gt;30 pg/mL</b>                                                                                                         | 6.5<br>(3.2 - 11.6)                | 97.7<br>(94.7 - 99.3)              | 66.7<br>(41.1 - 85.2)      | 59.6<br>(58.4 - 60.7)      | 2.4                               |
| <b>DHEA-S &gt; 100 mcg/dL<br/>and ACTH &gt;15 pg/mL</b>                                                                                                        | 24.0<br>(17.5 - 31.6)              | 95.9<br>(92.3 - 98.1)              | 80.4<br>(67.2 - 89.2)      | 64.0<br>(61.8 - 66.1)      | 4.1                               |
| <b>DHEA-S &gt; 100 mcg/dL<br/>and ACTH &gt;20 pg/mL</b>                                                                                                        | 13.0<br>(8.1 - 19.3)               | 96.3<br>(92.9 - 98.4)              | 71.4<br>(53.1 - 84.7)      | 60.9<br>(59.3 - 62.5)      | 3.7                               |
| <b>DHEA-S &gt; 100 mcg/dL<br/>and ACTH &gt;25 pg/mL</b>                                                                                                        | 6.5<br>(3.2 - 11.6)                | 97.2<br>(94.1 - 99.0)              | 62.5<br>(38.2 - 81.8)      | 59.4<br>(58.3 - 60.6)      | 2.8                               |
| <b>DHEA-S &gt; 100 mcg/dL<br/>and ACTH &gt;30 pg/mL</b>                                                                                                        | 4.6<br>(1.9 - 9.1)                 | 98.6<br>(96.0 - 99.7)              | 70.0<br>(38.0 - 89.9)      | 59.3<br>(58.4 - 60.2)      | 1.4                               |
